# Supplementary material for: Mineralization of calcium phosphate induced by a silk fibroin film under different biological conditions
Source: Royal Society of Chemistry journal article supplement (doi:10.1039/d1ra02199k), 2021-01-01
Supplement: d1ra02199k1.pdf [file d1ra02199k1.pdf]

## **Mineralization of calcium phosphate induced by silk fibroin film in different biological conditions**

Ying Huang,<sup>†a</sup> Zhaoyong Zou,<sup>†a</sup> Hang Ping,<sup>a</sup> Liwen Lei,<sup>a</sup> Jingjing Xie,<sup>a</sup> Hao Xie,<sup>\*b</sup> and Zhengyi Fu <sup>\*a</sup>

<sup>a</sup> State Key Laboratory of Advanced Technology for Materials Synthesis and Processing, Wuhan University of Technology, Wuhan, 430070, China

<sup>b</sup> School of Chemistry, Chemical Engineering, and Life Science, Wuhan University of Technology, Wuhan, 430070, China

Corresponding author: [zyfu@whut.edu.cn](mailto:zyfu@whut.edu.cn) (Z. Fu); [h.xie@whut.edu.cn](mailto:h.xie@whut.edu.cn) (H. Xie)

<sup>†</sup>These authors contributed equally to this work

## Supporting information

**Table S1.** The thickness of MSF and SF formed in different concentrations of silk fibroin.

| <b>SF &amp; MSF</b>   | <b>3 %</b> | <b>6 %</b> | <b>9 %</b> | <b>12 %</b> | <b>15 %</b> |
|-----------------------|------------|------------|------------|-------------|-------------|
| <b>Thickness (mm)</b> | 0.32       | 0.55       | 0.64       | 0.75        | 1.03        |

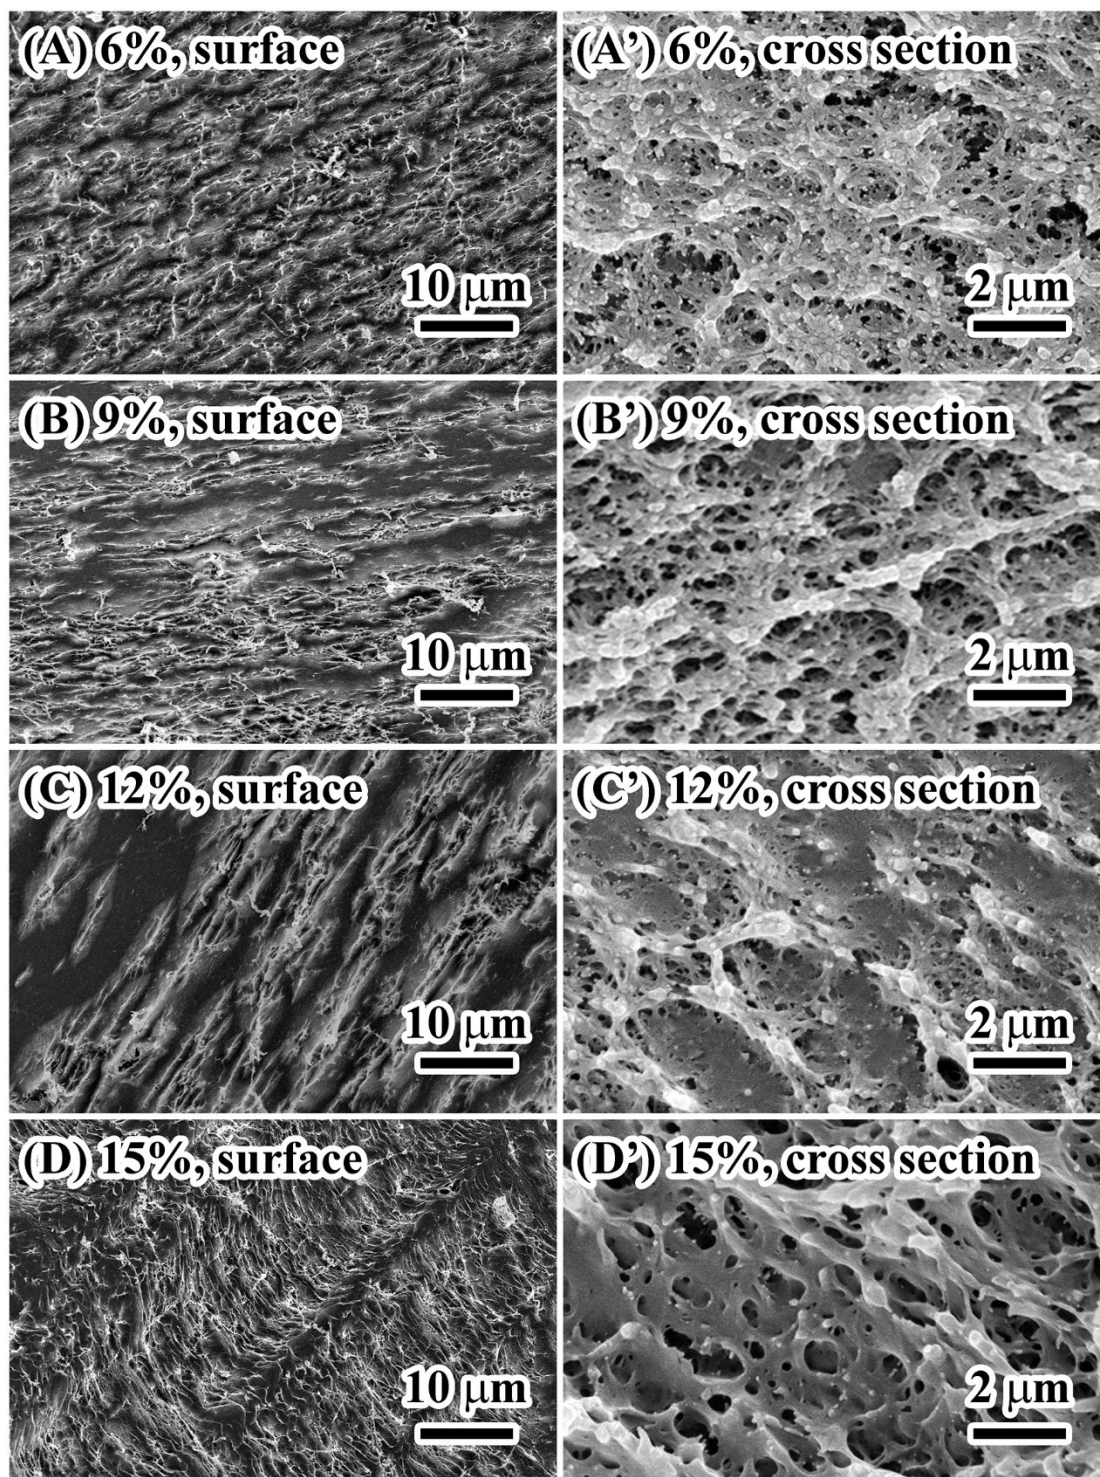

**Figure S1.** Surface and cross section of SF generated in 6% (A, A'), 9% (B, B'), 12% (C, C'), and 15% (D, D') silk fibroin solutions.

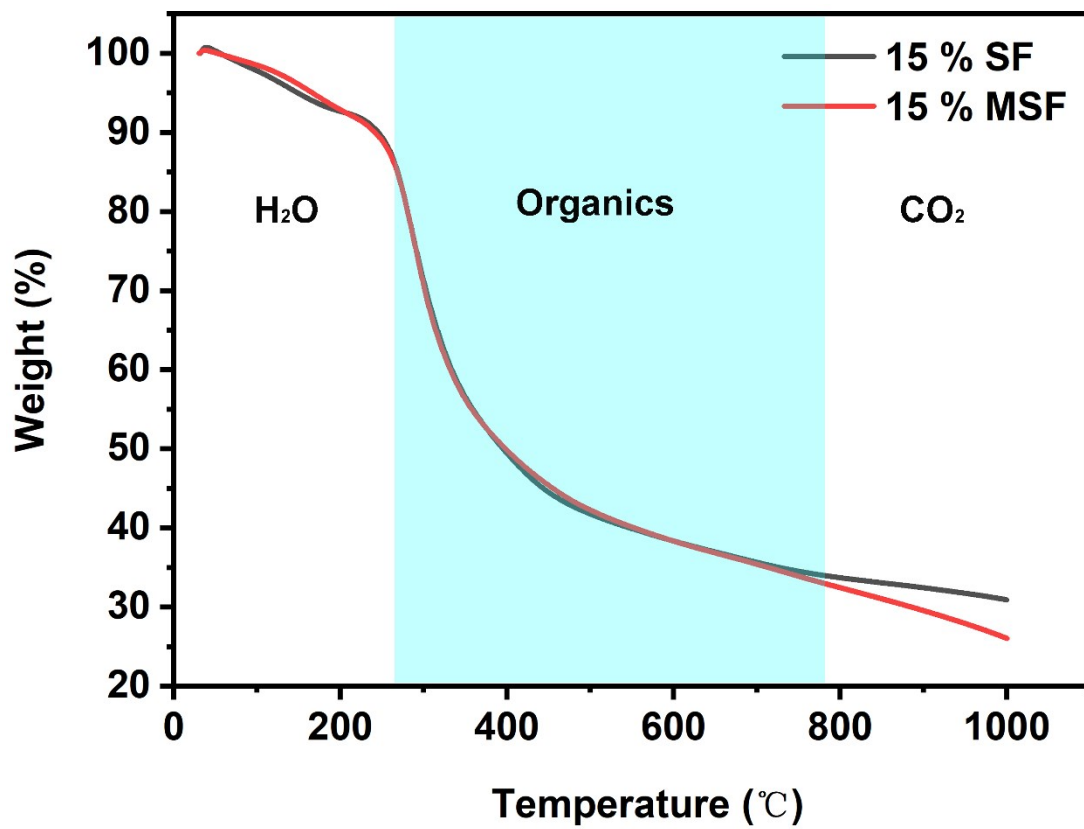

Figure S2. TGA analysis of SF and MSF.

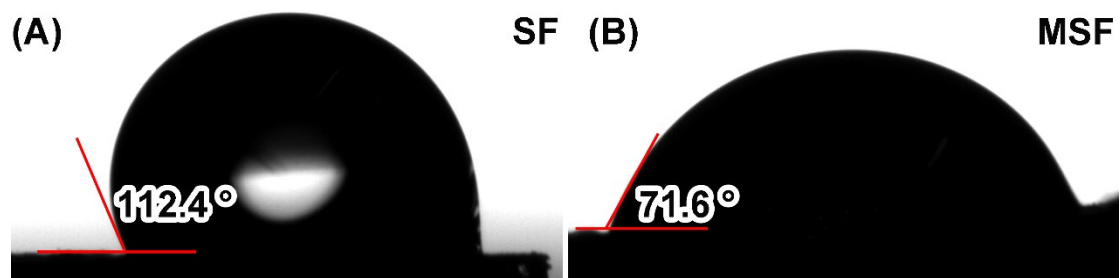

**Figure S3.** Water contact angles of SF (A) and MSF (B).

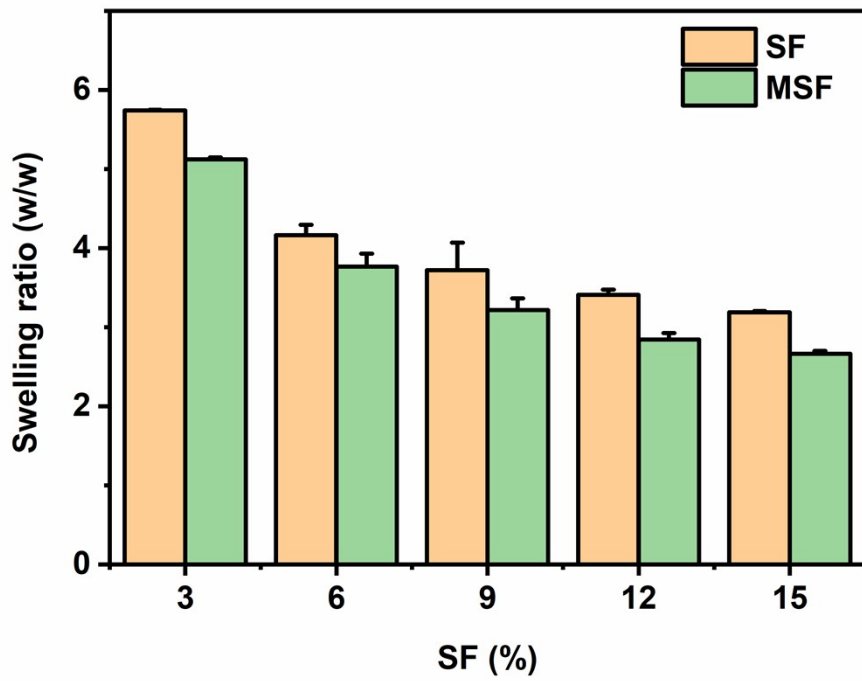

**Figure S4.** Swelling ratio of SF and MSF with different concentrations of silk fibroin.

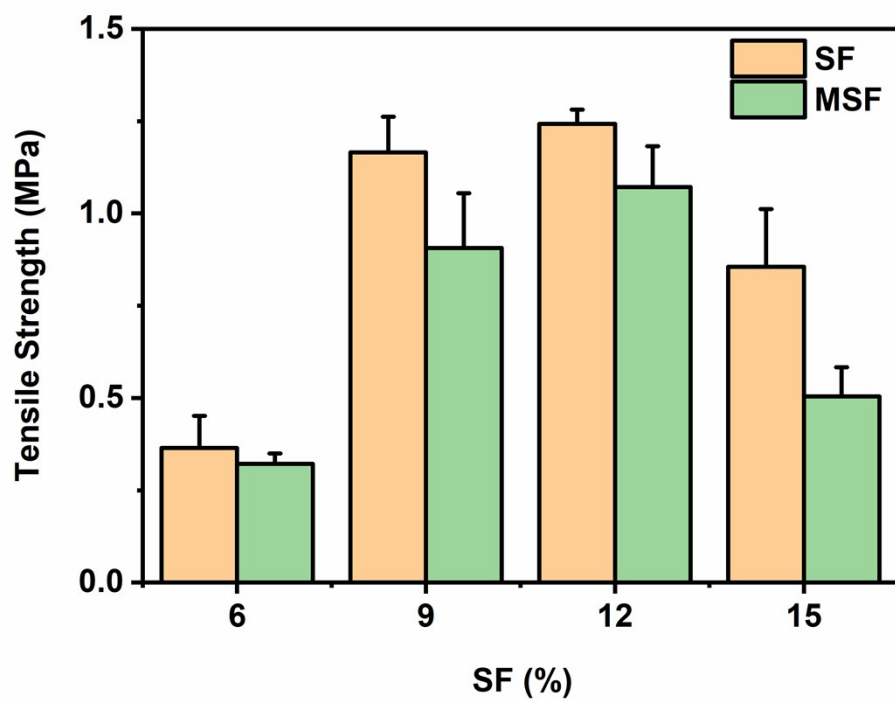

**Figure S5.** Tensile strength of SF and MSF with different concentrations of silk fibroin.

**Table S2.** Ca/P ratio of MSF after enzymatic solutions 24 h treatment

|                | <b>Ca</b> | <b>P</b> | <b>Ca/P</b> |
|----------------|-----------|----------|-------------|
| <b>1</b>       | 20.79     | 13.28    | 1.57        |
| <b>2</b>       | 20.41     | 13.6     | 1.50        |
| <b>3</b>       | 20.24     | 12.35    | 1.64        |
| <b>Average</b> |           |          | 1.57±0.07   |



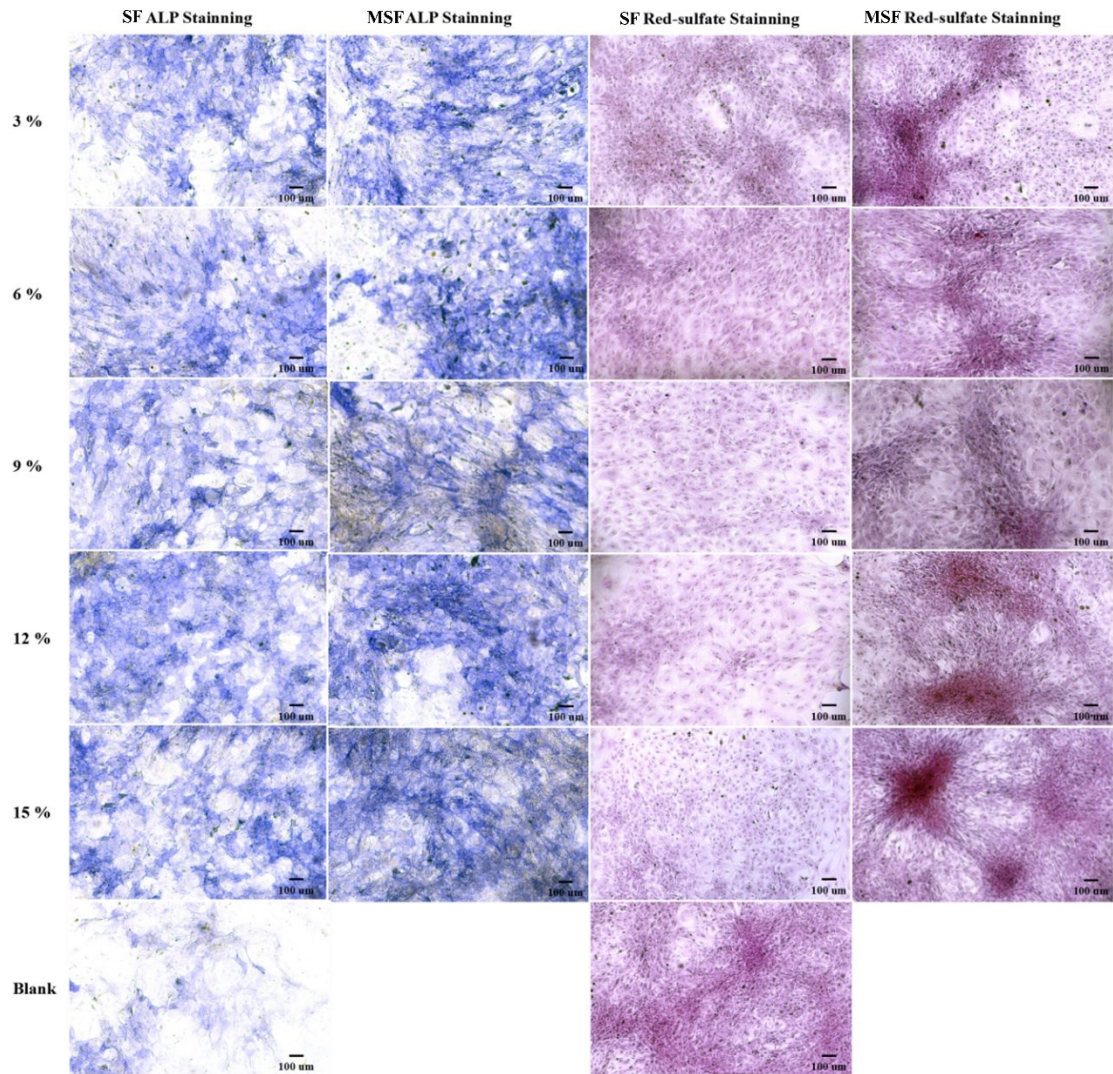

**Figure S6.** ALP staining and red sulfate staining of osteoblast cultivation with or without silk fibroin films. The concentrations of silk fibroin used for generating silk fibroin films are shown in the left row. Blank indicates cells growing without addition of silk fibroin films.
